# Supplementary material
Source: PubMed Central journal article supplement (PMC324409)
Supplement: 1471-2474-5-1-S1.pdf [file 1471-2474-5-1-S1.pdf]

Results from the clinical examination – nerve provocative tests. Number of people with positive findings. L=left, R=right.

| Driver categories and referents |                           |   |                      |   |                       |   |                     |   |
|---------------------------------|---------------------------|---|----------------------|---|-----------------------|---|---------------------|---|
| Provocative test                | Forest machine<br>(n= 15) |   | Snowmobile<br>(n=15) |   | Snowgroomer<br>(n=15) |   | Referents<br>(n=15) |   |
|                                 | R                         | L | R                    | L | R                     | L | R                   | L |
| Foramina compression            | 3                         | 5 | 5                    | 6 | 6                     | 5 | 6                   | 3 |
| Arm laséque                     | 3                         | 5 | 9                    | 7 | 6                     | 4 | 5                   | 4 |
| Plexus brachialis compression   | 5                         | 3 | 3                    | 5 | 1                     | 3 | 3                   | 3 |
| Tinel                           | 0                         | 2 | 2                    | 3 | 4                     | 4 | 2                   | 1 |
| Phalen                          | 3                         | 4 | 4                    | 4 | 5                     | 5 | 1                   | 1 |
| Pronator compression test       | 4                         | 4 | 6                    | 6 | 4                     | 5 | 5                   | 3 |
| AER                             | 4                         | 2 | 3                    | 3 | 5                     | 5 | 3                   | 5 |
