# Supplementary material
Source: PubMed Central journal article supplement (PMC324409)
Supplement: 1471-2474-5-1-S2.pdf [file 1471-2474-5-1-S2.pdf]

Results from the clinical examination. Range of movement (ROM) in the neck and pain arches (Pain in end position, flexion-extension) in degrees, strength handgrip (bar), thermal perception expressed in neutral zones (Celsius degrees) and superficial sensibility ( $g/mm^2$ ).

| Driver categories and referents              |                           |                      |                       |                     |
|----------------------------------------------|---------------------------|----------------------|-----------------------|---------------------|
| Clinical test                                | Forest machine<br>(n= 15) | Snowmobile<br>(n=15) | Snowgroomer<br>(n=15) | Referents<br>(n=15) |
| ROM flex-ext (mean, sd)                      | 117 (23)                  | 117 (28)             | 113 (20)              | 105 (28)            |
| Pain in end position, flexion <sup>a</sup>   | 43 (25): 3                | 56 (8): 6            | 49 (11): 7            | 42 (19): 2          |
| Pain in end position, extension <sup>a</sup> | 38 (18): 2                | 40 (14): 3           | 37 (12): 4            | 41 (23): 3          |
| ROM rotation (mean, sd)                      | 136 (24)                  | 131 (22)             | 131 (22)              | 131 (27)            |
| Pain in end position, left <sup>a</sup>      | 51 (19): 5                | 55 (7): 4            | 52 (7): 7             | 53 (23): 4          |
| Pain in end position, right <sup>a</sup>     | 65 (25): 4                | 58 (13): 4           | 55 (8): 7             | 55 (28): 4          |
| Strength handgrip, left <sup>b</sup>         | 0.97 (0.3): 15            | 1.84 (3.5): 14       | 1.09 (0.3): 15        | 11.0 (0.3): 13      |
| Strength handgrip, right <sup>b</sup>        | 1.02 (0.2): 15            | 0.97 (0.3): 14       | 1.11 (0.3): 15        | 0.98 (0.3): 14      |
| Neutral zone dig II left <sup>b</sup>        | 10.8 (4.1): 14            | 10.0 (3.9): 13       | 11.8 (4.8): 15        | 11.4 (5.4): 14      |
| Neutral zone dig II right <sup>b</sup>       | 8.9 (3.4): 14             | 11.5 (4.9): 15       | 12.9 (6.2): 15        | 11.4 (4.4): 13      |
| Neutral zone dig V left <sup>b</sup>         | 12.1 (5.3): 14            | 12.6 (3.2): 15       | 13.4 (4.6): 15        | 12.2 (5.3): 13      |
| Neutral zone dig V right <sup>b</sup>        | 10.5 (3.2): 14            | 12.9 (4.2): 13       | 12.3 (5.6): 15        | 11.3 (4.6): 13      |
| Van Frey, dig II, left <sup>b</sup>          | 12.3 (4.0): 15            | 11.7 (4.7): 13       | 12.7 (8.2): 14        | 10.3 (3.2): 14      |
| Van Frey, dig II, right <sup>b</sup>         | 12.3 (4.0): 15            | 12.5 (4.2): 13       | 12.9 (8.2): 14        | 11.9 (3.9): 14      |
| Van Frey, dig V, left <sup>b</sup>           | 11.8 (3.9): 15            | 10.8 (3.7): 13       | 13.2 (8.3): 14        | 9.5 (2.4): 14       |
| Van Frey, dig V, right <sup>b</sup>          | 12.1 (4.4): 14            | 11.4 (3.6): 13       | 12.7 (7.9): 14        | 10.3 (3.2): 14      |

<sup>a</sup>Mean (sd): number of people with positive finding

<sup>b</sup>Mean (sd): number of people with conclusive data
